# Supplementary material for: Rare earth complexes of phenoxy-thioether ligands: synthesis and reactivity in the ring opening polymerization of cyclic esters
Source: Royal Society of Chemistry journal article supplement (doi:10.1039/c3dt00066d), 2013-01-01
Supplement: c3dt00066d.pdf [file c3dt00066d.pdf]

## Supporting Information

### Rare Earth Silylamido Complexes of Phenoxy-Thioether Ligands: Synthesis and Reactivity in the Ring Opening Polymerization of Cyclic Esters.

Mina Mazzeo,\* Roberta Tramontano, Marina Lamberti, Alessia Pilone, Stefano Milione and Claudio Pellecchia\*

*Department of Chemistry and Biology, University of Salerno. I-84084, via Ponte don Melillo, Fisciano, Salerno, Italy.*

#### Table of contents

|                                                                                                                                                                                |                                      |
|--------------------------------------------------------------------------------------------------------------------------------------------------------------------------------|--------------------------------------|
| <b>Table S1</b> PGSE experimental results compared to estimated data from DFT .....                                                                                            | <b>SError!</b>                       |
| <b>Bookmark not defined.</b>                                                                                                                                                   |                                      |
| <b>Table S2</b> Internal and Free Energies in Gas Phase and Benzene of Minimum Energy Structures Relative to $(L^1)_2Sc\{N(SiH_3)_2\}$ and $(L^1)_2Y\{N(SiH_3)_2\}(THF)$ ..... | <b>SError! Bookmark not defined.</b> |
| <b>Figure S1</b> Methyl region of the VT $^1H$ NMR spectra of complex <b>1-a</b> .....                                                                                         | S3                                   |
| <b>Figure S2</b> Methylene region of the VT $^1H$ NMR spectra of complex <b>1-a</b> .....                                                                                      | S3                                   |
| <b>Figure S3.</b> Plot of number-averaged molecular weights versus conversion. ....                                                                                            | S4                                   |
| <b>Figure S4</b> Pseudo-first-order kinetic plots for ROP of $\epsilon$ -caprolactone promoted by <b>1-a</b> . ....                                                            | S4                                   |
| <b>Figure S5</b> Pseudofirst-order kinetic plot for ROP of L-LA promoted by <b>1-a</b> .....                                                                                   | S5                                   |
| <b>Figure S6</b> Pseudofirst-order kinetic plot for ROP of L-LA promoted by <b>1-b</b> . ....                                                                                  | S5                                   |
| <b>Figure S7</b> $^1H$ NMR spectrum (400 MHz, $CDCl_3$ , 298 K) of oligomers of $\epsilon$ -CL .....                                                                           | S6                                   |
| <b>Figure S8</b> $^1H$ NMR spectrum (400 MHz, $CDCl_3$ , 298 K) of oligomers of L-LA.....                                                                                      | S7                                   |
| <b>Figure S9</b> ESI-MS spectrum of oligomers of L-lactide .....                                                                                                               | S8                                   |
| <b>Figure S10</b> Thermal Analysis .....                                                                                                                                       | S9                                   |

**Table S1.** PGSE experimental results ( $r_H$ ) compared to estimated data from DFT optimized structures ( $r'_H$ ).

| Complex       | $\Delta$ (P30) | $D$<br>( $\times 10^{-10}$ m <sup>2</sup> /s) | $D^{\text{TMSS}}$<br>( $\times 10^{-10}$ m <sup>2</sup> /s) | $r_H$<br>(Å) | $V_H$<br>(Å <sup>3</sup> ) | $r'_H$<br>(Å) |
|---------------|----------------|-----------------------------------------------|-------------------------------------------------------------|--------------|----------------------------|---------------|
| <b>1-a</b>    | 1780           | 5.8                                           | 12.7                                                        | 7.16         | 1537                       | 6.87          |
| <b>1-a-CL</b> | 1900           | 4.5                                           | 10.5                                                        | 7.37         | 1677                       | 7.07          |

**Table S2.** Internal and Free Energies in Gas Phase and Benzene of Minimum Energy Structures Relative to  $(\mathbf{L}^1)_2\text{Sc}\{\text{N}(\text{SiH}_3)_2\}$  and  $(\mathbf{L}^1)_2\text{Y}\{\text{N}(\text{SiH}_3)_2\}(\text{THF})$ .<sup>a</sup>

| Structure | $\Delta E_{\text{gas}}$ | $\Delta E_{\text{C}_6\text{H}_6}$ | $\Delta G_{\text{gas}}$ | $\Delta G_{\text{C}_6\text{H}_6}$ |
|-----------|-------------------------|-----------------------------------|-------------------------|-----------------------------------|
| A         | 0.0                     | 0.0                               | 0.0                     | 0.0                               |
| E         | 4.2                     | 4.0                               | 3.9                     | 3.8                               |
|           |                         |                                   |                         |                                   |
| F         | 0.0                     | 0.0                               | 0.0                     | 0.0                               |
| G         | 1.4                     | 1.8                               | -0.3                    | 0.1                               |
| H         | 4.0                     | 3.9                               | 3.2                     | 3.1                               |
| I         | 3.1                     | 2.9                               | 3.4                     | 3.3                               |
| J         | 4.2                     | 4.2                               | 4.1                     | 4.1                               |
| K         | 7.2                     | 6.5                               | 4.4                     | 3.8                               |

<sup>a</sup> Zero Point Energy (ZPE) Corrected Energies in gas phase ( $\Delta E_{\text{gas}}$ ) and in benzene ( $\Delta E_{\text{C}_6\text{H}_6}$ ) and Free Energies thermodynamically corrected to 298 K in gas phase ( $\Delta E_{\text{gas}}$ ) and in benzene ( $\Delta E_{\text{C}_6\text{H}_6}$ ) (kcal/mol)

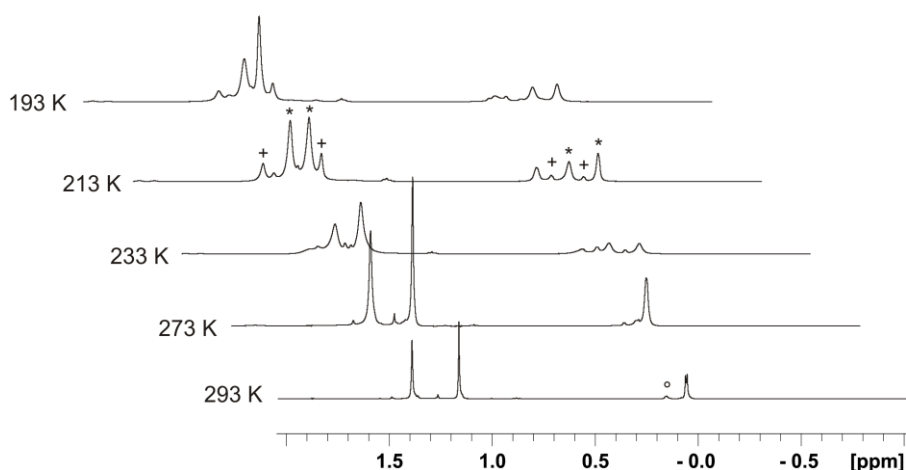

**Figure S1.** Methyl region of the  $^1\text{H}$  NMR spectra of complex **1-a** recorded in  $\text{CD}_2\text{Cl}_2$  at variable temperatures. Signals denoted with (\*) and (+) are attributable to the methyl protons of tert-butyl (1.1 – 1.4 ppm) and amido groups (-0.3 – 0.1 ppm) of two different isomers. The complexity of the spectra in this area is also due to the presence of the proton signal of residual hexamethylsilazane (signal denoted with (°) at 293 K).

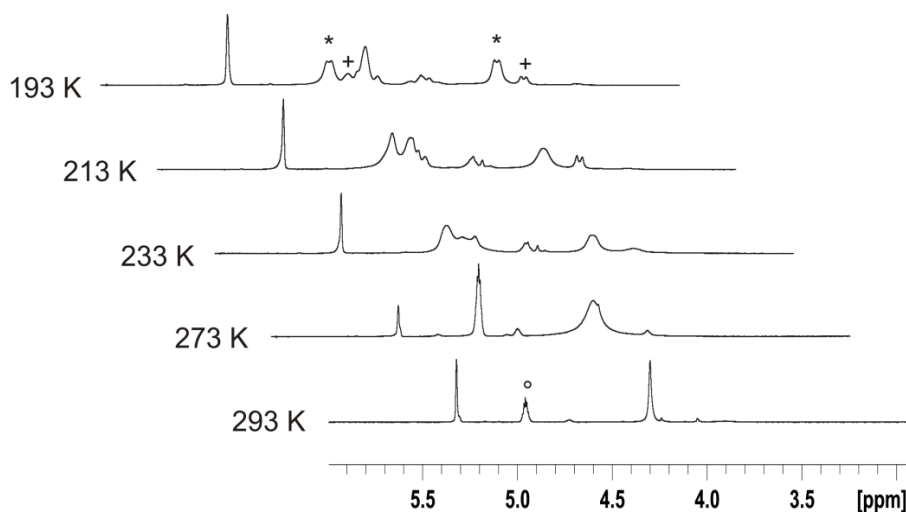

**Figure S2.** Methylene region of the  $^1\text{H}$  NMR spectra of complex **1-a** recorded in  $\text{CD}_2\text{Cl}_2$  at variable temperatures. Signals denoted with (\*) and (+) are attributable to the AB patterns of the methylene protons of two different isomers. The complexity of the spectra in this area is also due to the presence of the proton signals of the amido groups (signal denoted with (°) at 293 K).

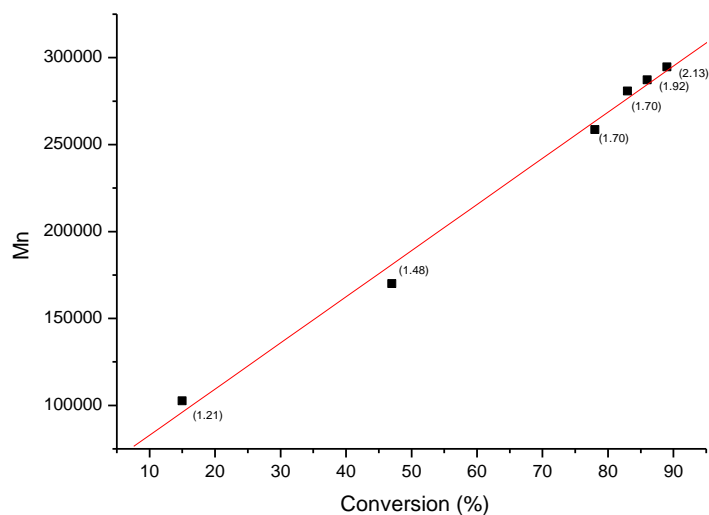

**Figure S3.** Plot of number-averaged molecular weights, Mn (KDa), and PDI values versus conversion for PCL produced by catalyst **1-b** at 25 °C.

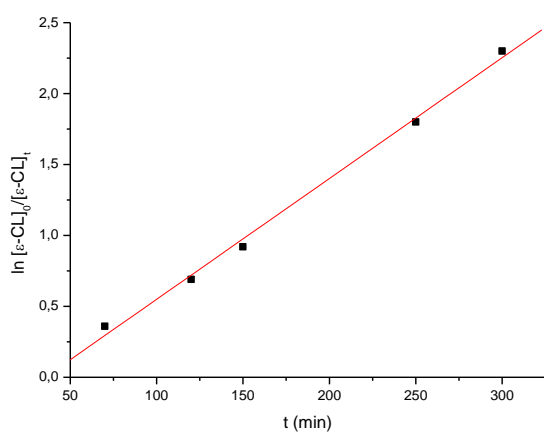

**Figure S4.** Pseudo-first-order kinetic plots for ROP of ε-caprolactone promoted by **1-a**. Pseudo-first-order rate constant is  $k_{app} = (8.52 \pm 0.32) \times 10^{-3} \text{ min}^{-1}$   $R = 0.99784$  ( $[\epsilon\text{-CL}] = 3 \cdot 10^{-3} \text{ M}$ ;  $[\epsilon\text{-CL}]/[\text{I}] = 500$ ;  $T = 298 \text{ K}$  solvent= THF)

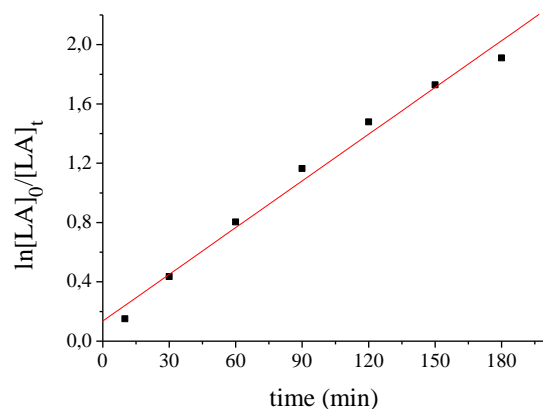

**Figure S5.** Pseudofirst-order kinetic plot for ROP of L-LA promoted by **1-a**. Pseudofirst-order rate constant is  $(1.05 \pm 0.06) \times 10^{-2} \text{ min}^{-1}$   $R = 0.99385$  ( $[I]_0 = 8.4 \text{ mM}$ ,  $[L-LA]_0/[I]_0 = 100$  toluene- $d_8$  as solvent;  $T = 313 \text{ K}$ )

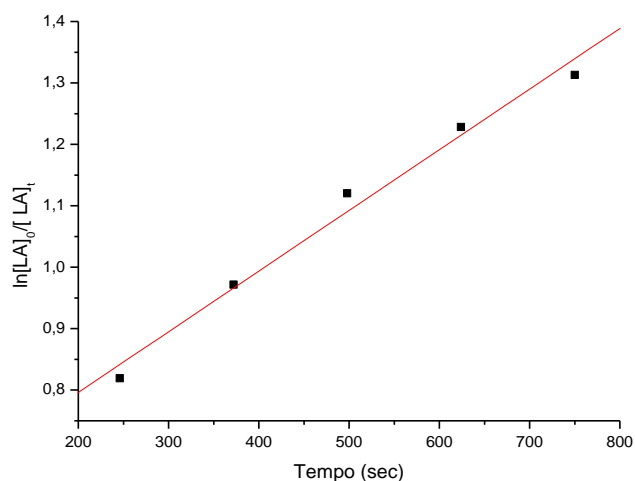

**Figure S6.** Pseudofirst-order kinetic plot for ROP of L-LA promoted by **1-b**. Pseudofirst-order rate constant is  $k_{app}: 9.87 \pm 0.6 \times 10^{-4} \text{ s}^{-1}$   $R = 0.99267$  ( $[I]_0 = 8.4 \text{ mM}$ ;  $[LA]_0/[I]_0 = 100$ ; toluene- $d_8$  as solvent;  $T = 313 \text{ K}$ )

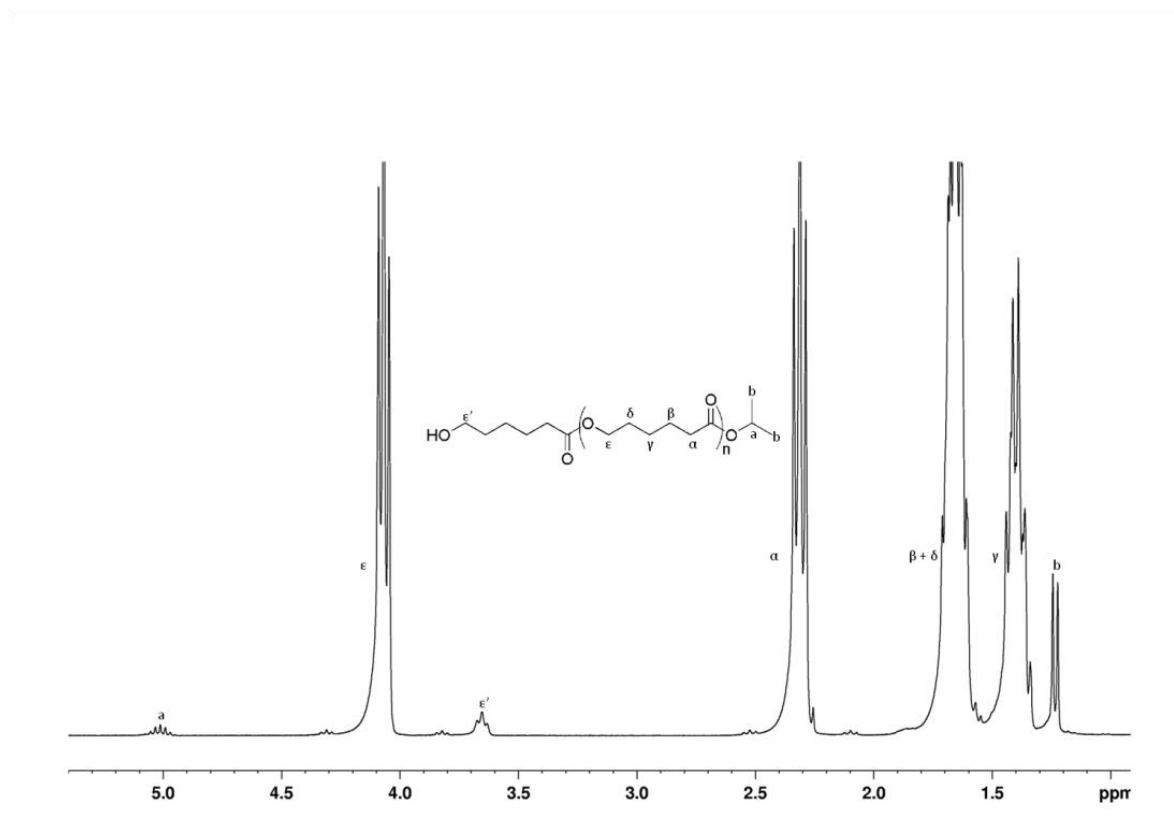

**Figure S7.**  $^1\text{H}$  NMR spectrum (400 MHz,  $\text{CDCl}_3$ , 298 K) of oligomers of  $\epsilon$ -CL obtained using **1-b**/2-propanol 1:10 as initiator after quenching with wet n-hexane (run 8, Table 2)

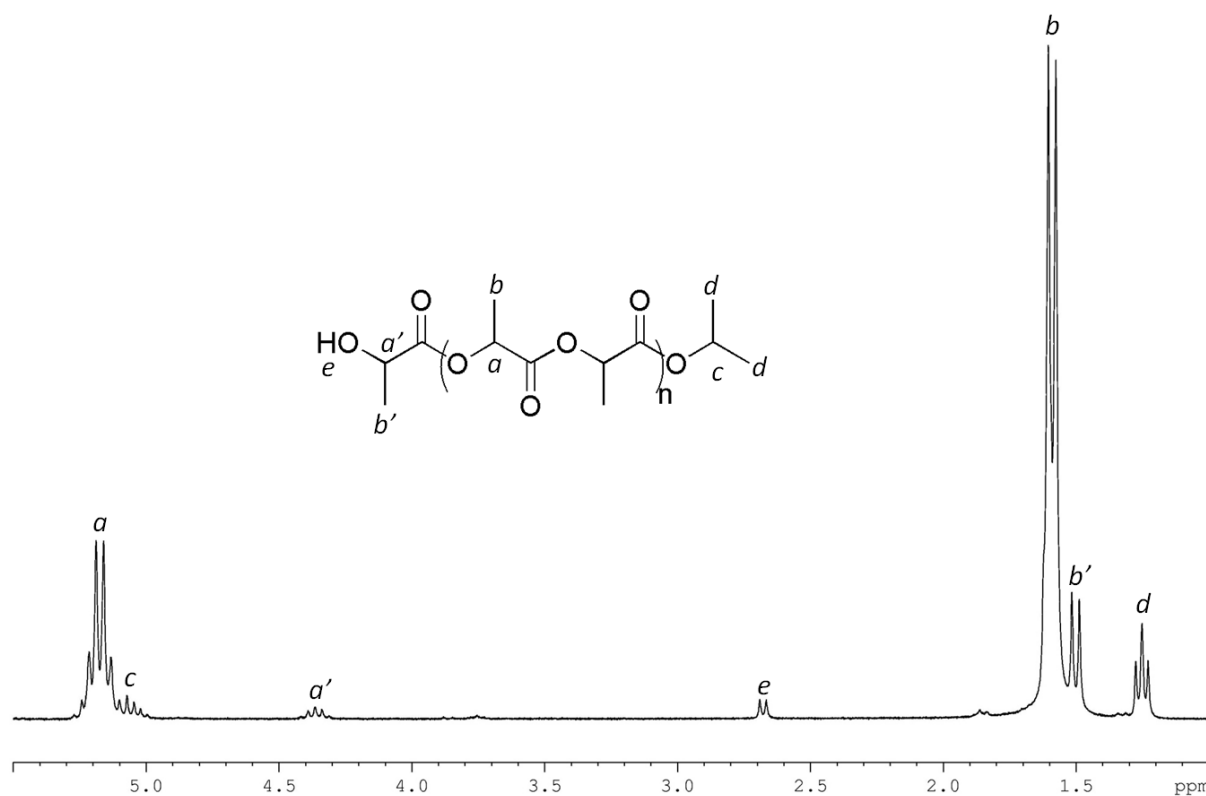

**Figure S8.**  $^1\text{H}$  NMR spectrum (400 MHz,  $\text{CDCl}_3$ , 298 K) of oligomers of L-lactide obtained using **1-b**/2-propanol = 1:10 as initiator after quenching with wet *n*-hexane. Conditions:  $[\text{L-LA}]_0/[\text{1-b}]_0 = 20$ , Toluene 2 mL,  $T=25^\circ\text{C}$ .

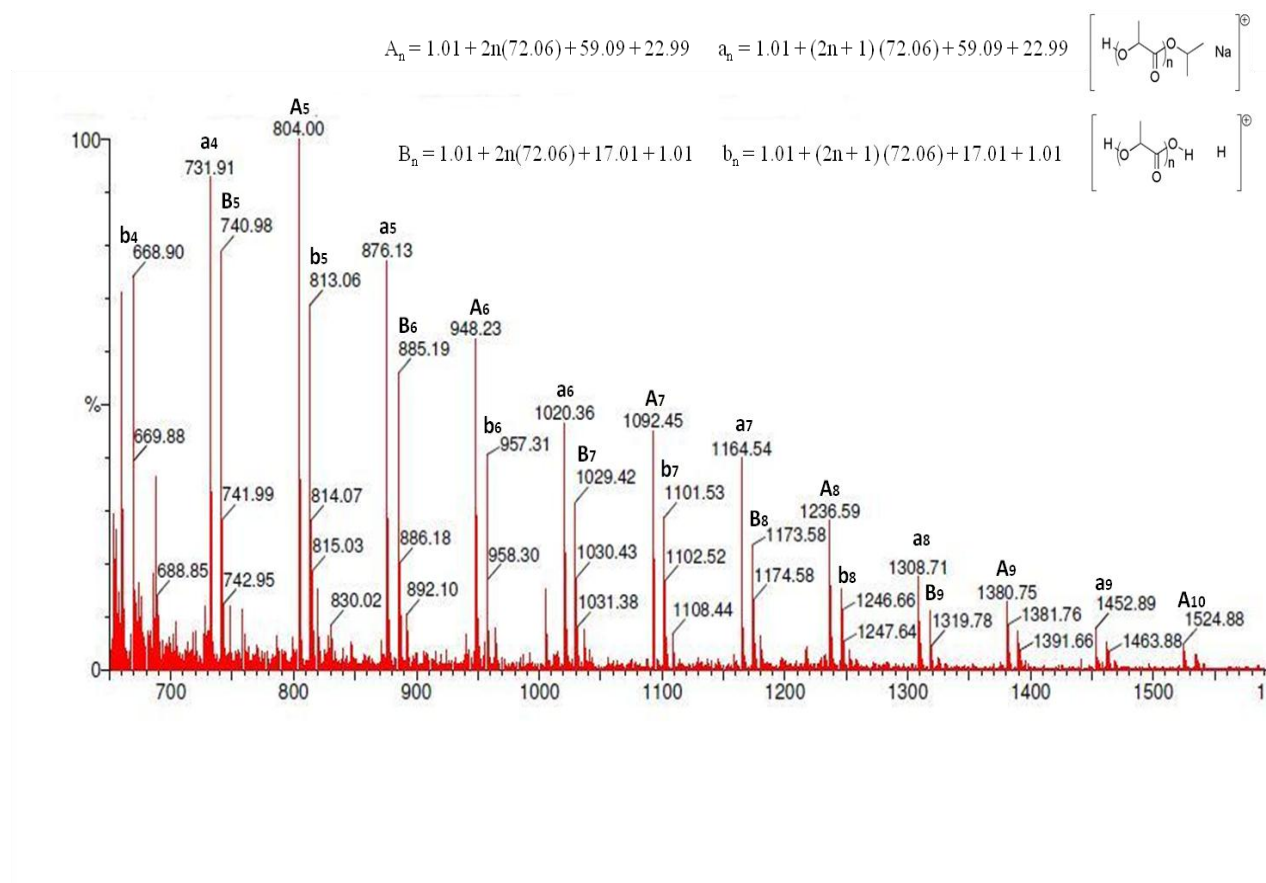

**Figure S9.** ESI-MS spectrum of oligomers of L-lactide using **1-b** as initiator. Capital letters have been used to denote the oligomers with complete monomer units with isopropoxide and hydroxide end groups ( $A_n$  and  $B_n$  respectively). Lowercase letters denoted oligomers with odd half monomer units.

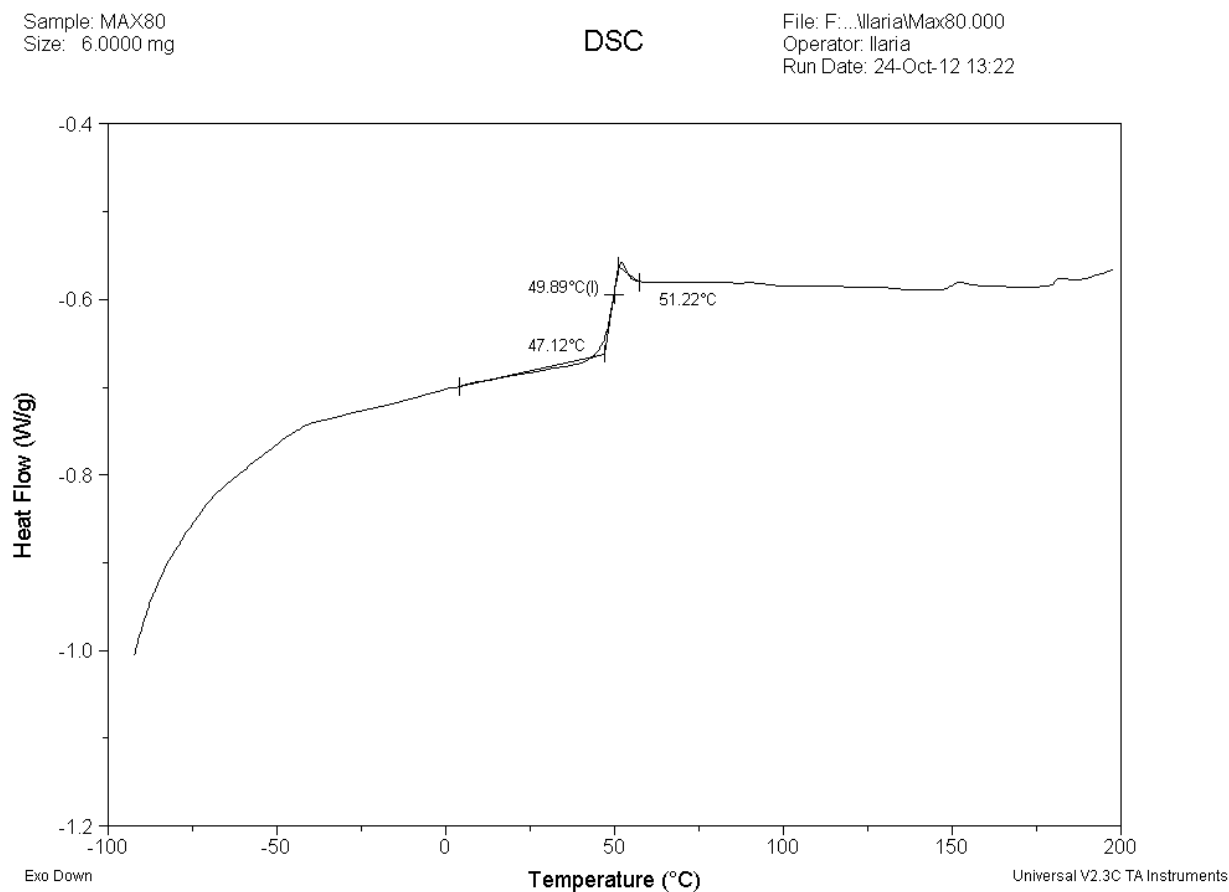

**Figure S10.** Thermal analysis of heterotactic PLA obtained in run 16 of Table 3.
